# Supplementary material
Source: PubMed Central journal article supplement (PMC4000807)
Supplement: 1320945111_sapp.pdf [file 1320945111_sapp.pdf]

## **Supporting Information**

### **Material and Methods**

#### **Reprogramming MEFs into iPS cells**

iPS cell reprogramming protocol was followed as described (1). Briefly, lentiviral particles (OSKM and M2rtTA from Addgene) were packaged in 293T cells. After incubation of 293T cells, infected medium containing virus particles was filtered (0.45  $\mu\text{m}$ ) and then transferred to plates growing either WT or KO MEFs (less than 3 passages). The following day, medium was changed into ES cell medium as described above. Doxycycline (Stemgent) was added at 2  $\mu\text{g}/\text{ml}$ . The above medium including doxycycline was replaced at least every other day for approximately 20 or more days. ES cell clones were hand-picked, then propagated and tested for ES cell characteristics.

#### **CG methylation analysis**

For whole genome bisulfite sequencing of *Lsh*<sup>-/-</sup> and WT primary murine embryonic fibroblasts the protocol was applied as previously described (2). Single-read MethylC-Seq sequences were processed and aligned to MM9, and an additional filter was added to remove any mapped reads in which a read-C base was aligned to a reference-T base. The sequence data was filtered for methyl-cytosines with  $\geq 5$  sequence reads. The methylation ratio presents the fraction of methyl-cytosine to the number of sequence reads. For Bisulfite sequencing at single loci genomic DNA (0.5 $\mu\text{g}$ ) was bisulfite-converted, PCR amplified and fragments subcloned. 10 clones for each sample were sequenced to identify the methylation status of cytosines. The

methylation result is expressed as CG methylation ratio (fraction of methylated cytosine over total cytosine) or as percentage of methylated cytosine.

### **Immunofluorescence staining**

Cells in chamber slides were fixed in 4% paraformaldehyde for 10 min at 25 °C, washed twice with PBS, then permeabilized for 15 min with 0.2% TritonX-100 in PBS, and blocked for 20 min with 5% goat serum in PBS. After incubation with primary antibodies against Tubb3 (Abcam, ab18207); Nestin (Abcam, ab11306); NeuN (Millipore, Mab377); Olig2 (Abcam, ab42453); Map2 (Sigma, 11M4848); SSEA1 (Stemgent, 09-0085); Oct4 (Stemgent, 09-0023); Nanog (Stemgent, 09-0020); and Sox2 (Millipore, MAB4343) for 2 hrs in 1% BSA in PBS, cells were washed three times with PBS and incubated with fluorophore-labeled appropriate secondary antibodies purchased from Millipore. The images were acquired with a Zeiss confocal microscope.

### **Enhancer reporter assay**

Predicted enhancer sequences were selected for validation in reporter assays. The chromosome location and primers are listed in Supplementary Table S1. Cloning and reporter assays were carried out as previously reported (3), Fragments were subcloned into the pGL3 promoter plasmids (Promega E1761) with BamHI and Sall. The constructs were transfected into Lsh<sup>-/-</sup> MEFs, HeLa S3 and Neuro-2a cells (ATCC) with lipofectamine 2000 (Invitrogen) and GenJet™ DNA *In Vitro* Transfection Reagent (SignaGen Laboratories) separately. Fragments were designated as active if their relative luciferase value was significantly higher than control in HeLa S3 or Neuro-2A cells (p-value < 0.05).

### **Teratoma formation assay**

Three sets of iPS clones were resuspended in PBS, kept on ice and drawn into 1-mL syringe immediately before injection. Approximately  $1 \times 10^6$  cells in 100  $\mu$ l/injection site were used. Nude mice were injected in the dorso-lateral area into the subcutaneous space on both sides. After 4 weeks, teratoma were collected for size measurement, immunostaining, FACS, and gene expression analysis.

### **Flow cytometry analysis**

Teratoma were sliced into small pieces, the undesirable tissue such as fat or necrotic material was removed, and incubated with 1mg/ml collagenase D at 37° C for 20 min. The cell suspension was passed through a nylon mesh to remove undigested fragments. After centrifugation of the supernatants at 100g for 3 min, the pellet was resuspended in cell culture medium. Dissociated cells were fixed in 1% paraformaldehyde for 10 min, and the standard immunostaining protocol was performed. For surface marker staining,  $10^5$ - $10^6$  cells were resuspended in 100  $\mu$ l blocking buffer for 30 min at 4° C. Directly conjugated primary antibodies (APC-CXCR4 or APC-FLK1, Biolegend) were added to the cells at a final dilution of 1:200 and incubated for 30 min at 4° C. Stained cells were washed twice in PBS-FBS buffer. Isotype-matched mouse or rabbit IgG1 (Millipore) were used as negative controls to set the threshold for non-specific binding. FACS Calibur (BD Biosciences) instruments were used for analysis (Flow cytometry core facility of NCI/NIH).

## ChIP-Seq analysis

Biologic replica were evaluated for correlation as previously described (4). In brief, reads were sorted in bins of 1kb. Samples were normalized based on total aligned reads, and input signals were subtracted from sample signals. For H3K4me1 ChIP-Seq analysis the correlation of wt1 and wt2 was 0.998 and ko1 to ko2 was 0.943 for 2,464,195 windows. Reads from biological replicates for H3K4me1 (two WT and two KO MEF samples derived from litter mates) were merged. Peak detection (genomic bins that contained statistically significant ChIP-Seq enrichment) was performed using Partek Genomics Suite at an FDR<0.05 for autosomes only. Each read was extended toward the interior of the sequenced fragment (about 135-150bp), based on the strand of the alignment. H3K4me1 peaks were determined at a window of 150bp and selected at an FDR<0.0001 over their respective input. The following criteria was applied to term H3K4me1 modifications as predictive enhancers (4): H3K4me1 peaks were selected that had no overlap with any H3K4me3 peaks (either in WT or KO samples) and that were at least 2kb distant of transcriptional start sites (2kb upstream or downstream of TSS). Differentially enriched H3K4me1 peaks in KO MEFs over WT MEFs (or vice versa) was determined using an FDR <0.00001. In addition, raw sequence reads are presented in Fig1A (lower panel), supplement Fig S1B, and FigS4 to give highest resolution. The total read number in KO samples is as follows: KO#1 Input 21,874,452; KO#1 H3K4me1 21,579,939, KO#2 H3K4me1 22,601,971; WT#1 Input 23,387,459; WT#1 H3K4me1 28,134,577; WT#2 H3K4me1 30,242,670. Motif analysis was performed in Partek using the Jaspar Core Transcription Factor Database with a threshold p value<1e-250 with the exception of MafB p value<1.5e-58 (Dataset 3). KO-H3K4me1 peaks were defined as overlapping with cis-regulatory enhancer sequences if peaks

were less than 1 kb distant from the center base pair of the enhancer (4). Genes are considered as 'marked' with KO-H3K4me1 (WT-H3K4me1) if a KO-H3K4me1 (WT-H3K4me1) peak was localized within the 5' and 3' transcription unit including 5kb of flanking regions. For H3K4me1 association profiles at KO-H3K4me1 and WT-H3K4me1 sites normalized ChIP-Seq reads were tabulated in 100 bp windows including the center of the peak and 5 kb of flanking regions (Fig 2A, B). For CG methylation profiles CG methylation ratios were tabulated in 10 bp windows including the center of the peak and 5 kb of flanking regions (Fig 2C,D). For gene ontology (GO) pathway analysis we used Functional Annotation Pathway analysis in David (Dataset 1). The p-value represents the EASE score, a modified Fisher exact p-value as described (<http://david.abcc.ncifcrf.gov/home.jsp>). For GO term analysis of the Biologic Process Partek software was used and biologic process terms with respect to development selected. The raw ChIPs-seq data set of H3K4me1 and H3K27ac ChIPs derived from adult murine cortex, adult murine cerebellum and fetal murine brain used in supplemental Fig S4 is downloaded from Geomnibus (GSM722632, GSM722664, GSM851281, GSM851271, GSM851272, GSM851284).

### **ChIP-qPCR and gene expression analysis**

ChIP (chromatin immunoprecipitation) was performed under a combination of Young (5) and McMahon lab's protocol (Harvard University) with slight modifications. The following Chip-grade antibodies were used: H3K4me1 (Abcam, ab8895), H3K27ac (Abcam, ab4729), YY1 (Abcam, ab12132), Ets1 (Santa Cruz, sc-350), MafB (Santa Cruz, sc-22830 X), Zic1 (Santa Cruz, sc-28149X), Setd7 (Abcam, ab14820), Lsd1 (Santa Cruz, sc-271720X), MLL5 (Santa Cruz, sc-

292360 X) and normal rabbit/Mouse IgG1. Precipitated DNA was re-suspended in 60  $\mu$ l of Nuclease-Free water (Invitrogen) and analyzed by qPCR using the specific primers shown in Supplementary Table S1 (primers are listed for each gene in sequence according to Figures 1B). The normalization method for ChIP analysis is percent of input. In addition, the relative values were normalized to one site of each gene in WT sample. Every ChIPs results represents three independent experiments (mean and s.d. of n=3). For p-value computation the student t-test was applied. Anti-rabbit IgG served as negative control. All RNA samples were extracted by RNeasy Mini Kit (Qiagen) from 1 to  $5 \times 10^6$  cells, according to the manufacturer's instructions, and treated with DNase I (Roche). The cDNA was prepared with Superscript III First Strand cDNA Synthesis Kit (Invitrogen) from total RNA using oligo dT primer, followed by qPCR with the specific primers shown in Supplementary Table S1. All quantifications were normalized to an endogenous Gapdh and Actb control. The relative quantification value for each target gene compared to the calibrator for that target is expressed as  $2^{-(Ct-Cc)}$  (Ct and Cc are the mean threshold cycle differences after normalizing to Gapdh). For all qPCR, iQ SYBR Green Supermix was used in iCycler instrument (Bio-rad) according to the manufacturer's instructions.

### **Mesoderm and Endoderm differentiation**

The lineage differentiation protocol was performed as previously reported (6, 7). Before differentiation, 1 million cells per well of mouse iPS cells were plated onto wells coated with growth factor-reduced Matrigel (R&D systems) in MEF-conditioned medium with 20ng/ml bFGF. The medium was changed with RPMI-B27 medium supplemented with induction reagent activin

A (100ng/ml, R&D systems) 1 day and then Bmp4 (10ng/ml, R&D systems) 3 days for mesoderm differentiation, and medium was changed with MCDB-131 medium supplemented with 1% GlutaMax, glucose (5.5mM), 0.1% FAF-BSA (Invitrogen) , ITS:X (Invitrogen) , 0.25% NaHCO<sub>3</sub> and Wnt3a(20ng/ml, R&D systems)+ activin A (100ng/ml) for 1 day, then replaced with activin A (100ng/ml) for 3 days for endoderm differentiation. Cells were collected for further analysis of mesodermal and endodermal markers using real-time PCR analysis and FACS analysis. Mouse Mesenchymal Stem Cell Functional Identification Kit (Catalog # SC010) is used for chondrocyte and Osteoblast lineage differentiation.

## Reference

1. Lyssiotis CA, *et al.* (2009) Reprogramming of murine fibroblasts to induced pluripotent stem cells with chemical complementation of Klf4. (Translated from eng) *Proc Natl Acad Sci U S A* 106(22):8912-8917 (in eng).
2. Lister R, *et al.* (2009) Human DNA methylomes at base resolution show widespread epigenomic differences. (Translated from eng) *Nature* 462(7271):315-322 (in eng).
3. Heintzman ND, *et al.* (2007) Distinct and predictive chromatin signatures of transcriptional promoters and enhancers in the human genome. (Translated from English) *Nat Genet* 39(3):311-318 (in English).
4. Shen Y, *et al.* (2012) A map of the cis-regulatory sequences in the mouse genome. (Translated from eng) *Nature* 488(7409):116-120 (in eng).
5. Odom DT, *et al.* (2004) Control of pancreas and liver gene expression by HNF transcription factors. (Translated from eng) *Science* 303(5662):1378-1381 (in eng).
6. Chetty S, *et al.* (2013) A simple tool to improve pluripotent stem cell differentiation. *Nature methods* 10(6):553-556.
7. Kattman SJ, *et al.* (2011) Stage-specific optimization of activin/nodal and BMP signaling promotes cardiac differentiation of mouse and human pluripotent stem cell lines. *Cell stem cell* 8(2):228-240.

## Supporting Figure Legends

**Fig.S1 CG methylation profiles at KO-H3K4me1 peaks.** (A) Conventional bisulfite sequencing results representing CG methylation (percentage of methylated cytosine) at sequences located within KO-H3K4me1 peaks comparing KO MEFs to WT MEFs. The black circle represents a methylated cytosine, the open circle represents an unmethylated cytosine. CG methylation is represented as percentage. (B) UCSC genome browser representation of raw sequence data showing input (KO Input or WT Input), and H3K4me1 enrichment in KO MEFs (KO H3K4me1) compared to WT MEFs (WT H3K4me1) at selected neuronal genes. In the lower panel CG methylation ratios for WT and KO MEFs are presented with each orange bar representing the ratio of methylated cytosine at a single C<sub>p</sub>G site. The red line below the graph represents the area examined by conventional bisulfite sequencing (A) and in Fig.S2

**Fig.S2 Perturbed KO-H3K4me1 modification after siDnmt1 treatment.** (A) Dnmt1 western analysis after use of siDnmt1 in WT MEFs. (B) Conventional bisulfite sequencing results representing CG methylation at sequences located within KO-H3K4me1 peaks in siDnmt1 treated MEFs. For comparison are the methylation results of the same sequences analyzed for KO and WT MEFs in Fig S1. The black circle represents a methylated cytosine, the open circle an unmethylated cytosine. CG methylation is represented as percentage. (C) Relative enrichment of H3K4me1 after Dnmt1 reduction (siDnmt1) at several KO-H3K4me1 sites compared to

control treated WT MEFs (Ctrl). TRC Dnmt1 shRNA retro-viral vector sets were used from Thermo Scientific (RMM4534-EG13433).

**Fig.S3 GO term analysis for KO-H3K4me1 marked genes.** Gene ontology analysis (Partek) was performed for genes that were enriched for KO-H3K4me1 peaks. The graph presents Biologic Process GO terms (P value>0.05) selected for developmental processes.

**Fig.S4 Overlap of KO-H3K4me1 with enhancers present in brain tissues.** UCSC genome browser representation of raw sequence data showing input (KO Input or WT Input), and H3K4me1 enrichment in KO MEFs (KO H3K4me1) compared to WT MEFs (WT H3K4me1) at selected neuronal genes. In the upper three panels the center position of cis-regulatory sites in murine cortex, adult murine cerebellum, and fetal murine brain is presented (4). In addition, the raw sequence reads of H3K4me1 and H3K27ac of cortex, cerebellum and fetal brain (3) are shown to visualize the precise overlap of reads at highest resolution.

**Fig.S5 Characterization of Lsh KO iPS and WT iPS cells.** (A) Experimental schema for reprogramming. The transcription factors Oct4 (Pou5f1), Sox2, c-myc and Klf4 were overexpressed in primary fibroblasts derived from *Lsh*<sup>-/-</sup> (KO) and WT littermates using a polycistronic vector. iPS cells were isolated for each genotype. (B) Microscopic image of WT iPS and KO iPS cells. (C) Real-time PCR analysis for detection of Nanog, Oct4, Sox2 mRNA in WT iPS

and KO iPS cells comparing three independently derived cell lines of each genotype. ES cells served as positive control and MEFs as negative controls. (D) Real-time PCR analysis for detection of Lsh mRNA expression in WT iPS and KO iPS cells, ES cells and MEFs. (E) Bisulfite sequencing to examine CG methylation at the Oct4 promoter region in WT iPS and KO iPS, ES cells and WT MEFs for comparison. (F) Three independently derived sets of WT iPS and KO iPS clones were examined for alkaline phosphatase expression. (G) Immunofluorescence analysis of iPS cells for pluripotency markers expression Oct4, Nanog, SSEA1, and Sox2.

**Fig.S6 Characterization of neuronal marker gene expression in iPS cells.** (A) Confocal immunofluorescence analysis for the indicated markers upon neuronal differentiation after RA treatment at day4. Neuronal marker Nestin and Tubb3 expression in three independently derived sets of KO and WT iPS clones. (B) The percentage of positive Tubb3 staining of the gated population is shown in the bar graph. (C) Teratoma were harvested four weeks after injection of three sets of independently derived KO iPS clones and WT iPS clones. The size was measured individually.

**Fig.S7 Characterization of neuronal marker gene expression in teratoma.** Teratoma were harvested after 4 weeks and teratoma with similar size were dissociated to single cells, examined for mRNA expression of neuronal progenitor cell markers (A), immunostained with the neuron specific marker Tubb3 and Nestin (B), and examined by FACS analysis (C). The bar

represents 20 $\mu$ m. mRNA levels were normalized to one WT iPS cells for each gene, standard deviation was shown from duplicate experiments for three independent sample sets.

**Fig.S8 Transcription factor association at KO-H3K4me1 sites.** (A) ChIPs analysis using Real-time PCR analysis to assess TF enrichment at neuronal lineage genes at KO-H3K4me1 sites in KO MEFs compared to WT MEFs. (B) Western analysis to assess TF expression in WT and KO MEFs. (mean and s.d., n=3). \*\*, P-value<0.01 and \*, P-value<0.05. (C) YY1 and Ets1 association at WT-H3K4me1 marked sites. ChIPs analysis using anti-YY1, Ets1 antibodies followed by Real-time PCR analysis to detect YY1 and Ets1 enrichment at different loci of WT-H3K4me1 marked sites in WT and KO MEFs. Anti-Rabbit IgG served as negative control. The percentages of each PCR product in the immunoprecipitated sample per input are shown (mean and s.d., n=2), and the differences between WT and KO were analyzed for significance by Student's t test. \*\*, p<0.01 and \*, p<0.05. (D) Western analysis examining protein expression level of H3K4m1 modifying enzymes in WT and KO MEFs.

**Fig.S9 Mesoderm and Endoderm differentiation from different iPS clones.** (A) KO iPS clones (KO1 and KO2) and WT iPS clones (WT1 and WT2) were differentiated into the mesoderm lineage. (B) mRNA expression analysis using q-PCR analysis of mesodermal marker genes before (control) and after differentiation (induced). (C) FACS analysis quantifying the expression of the mesoderm marker protein FLK1 before (red) and after differentiation (blue).(D) KO iPS clones (KO1 and KO2) and WT iPS clones (WT1 and WT2) were differentiated into the endoderm lineage. (E) mRNA expression analysis using q-PCR analysis of endodermal marker genes before

(control) and after differentiation (induced). (F) FACS analysis quantifying the expression of the endodermal marker protein CXCR4 before (red) and after differentiation (blue).

**Fig.S10 Chondrogenic and osteogenic lineage differentiation for iPS clones.** Two KO iPS clones and Two WT iPS clones were differentiated into the chondrogenic lineage and stained with Alcian blue (A) or into the osteogenic lineage and stained with Alizarin red (B). The wild type ES cell line CCE served as control. No significant differences based on staining properties were detected comparing WT and KO iPS cells.

**Table S1 Mouse genome (MM9) is used for all analysis.**

**H3K4me1 and H3K27ac ChIP Primer Sequences**

| Name  | Sequence(5'to 3')                                       | H3K4me1 peaks position                       |
|-------|---------------------------------------------------------|----------------------------------------------|
| Grik2 | F: CCAAAGCAAAATCACCAACC<br>R: TCTGACCTTCTCAGGTACCAGAC   | chr10:48,911,935-48,912,873                  |
|       | F: GCTCTGTTCCAAGACGACATC<br>R: CCTTTCTTGTTGAAGCCTCTG    | chr10:49,436,870-49,437,004 * <sup>8</sup>   |
|       | F: CCTTTTGTCTCCACTAGAATAGG<br>R:TCAGCTACTCAAGGCAGGTTTG  | chr10:49,188,952-49,189,609                  |
| Mib1  | F: GGAGCGATAGAAGCATCAAAGC<br>R: TTAGTGGTAGACAGCTGGCTGG  | chr18:10,756,308-10,757,263                  |
|       | F: TCTTTGTAGCTCTGGCTGTCC<br>R: TAGCACGGCACCTAATGACC     | chr18:10,734,896-10,735,973 * <sup>9</sup>   |
| Nrcam | F: ACCTGATGGTTCTGTGTTTGATG<br>R: CCAATGGAAGGGACTAGGCTA  | chr12:45,471,308-45,473,346 * <sup>10</sup>  |
|       | F: CCTAGAGAATGAGGATTGTACCA<br>R: GCCTTTTGTCTTCCCTTCTCTG | chr12:45,557,942-45,559,905 * <sup>11</sup>  |
| Negrl | F: AATACCCACTGCAGCCTGACT<br>R: CAACCTTCTCCACCTCCCTC     | chr3:156,564,826-156,567,781 * <sup>12</sup> |
|       | F: CTTTTCTACAGCATCAATGGCAC<br>R: TGGCATGTGGTACTTGTCCAC  | chr3:156,269,101-156,271,059 * <sup>13</sup> |
| Nrxn1 | F: CAGCCTGATTACCACCAGTTTC<br>R: TGTCAGTTTTTGACACTGGATGG | chr17:91,235,787-91,236,788                  |
|       | F: TGACATGGTTGCACTGCTGAG<br>R: GGCAGTGAAAACCTCGAATGTGA  | chr17:91,156,795-91,158,285 * <sup>4</sup>   |
|       | F: ACCATTTCTTGGGCTTTGG<br>R: GCTCTGATATTGGGCTACTTC      | chr17:91,380,477-91,380,989 * <sup>16</sup>  |
| Nlgn1 | F: GCTTTTTTCTGCCTGTTGTG<br>R:GAGCCAGCTTCAGAATGTAGTG     | chr3:25,704,140-25,704,698 * <sup>5</sup>    |
|       | F: GGCATGTGTAAGCAAGAGTC<br>R: GATATGGCTCTCAAAGCTGG      | chr3:25,645,645-25,648,164 * <sup>6</sup>    |
| Reln  | F: TGAGCCTAAGAAGGTTAGCACG<br>R: AATCTCCTTGCCTTCTCCTG    | chr5:21,729,464-21,731,808                   |
|       | F: GTCAGAAGCAAAGCTAAGTGAC<br>R: CCGAAACTTTCCTGTTCCT     | chr5:21,834,299-21,835,333 * <sup>7</sup>    |
| Rims1 | F: GACAGCAAGAAAGCGAGCAT<br>R:CCAACTGCTTGAGACCAGATAAC    | chr1:22,411,453-22,412,240                   |
|       | F: GAGGGATTGCTGAGAAATTGAG<br>R: GAAGCCACAACCTGAAATCAAGG | chr1:22,619,415-22,624,96 * <sup>14</sup>    |
| Slit2 | F: TCCACCTTAGAAGCACCCAG<br>R:GAGCAATGCAGTCAGCTTCTG      | chr5:48,504,107-48,504,509                   |
|       | F: CCTTAAGCTCCTGGACACTGC<br>R:TGCTGGCACCTCAATCTCAC      | chr5:48,567,966-48,568,749 * <sup>15</sup>   |
|       | F: AGATTCTGAGGTTGGAGGCAC<br>R:GTGACTTTAGCTGGGTTTCTGTTC  | chr5:48,653,094-48,653,847 * <sup>1</sup>    |

|        |                                                      |                                             |
|--------|------------------------------------------------------|---------------------------------------------|
| Shank2 | F: CCTGGAAAGGATTTGGCAC<br>R:GCAGGATGCTTTCAGGTTG      | chr7:151,407,617-151,409,280                |
|        | F: GCACCCTCCTTACTCCCTACA<br>R: TGTGGAATTTGGGGTTCTAGG | chr7:151,418,691-151,421,132 * <sup>2</sup> |
|        | F: CCATTGCCTCCATTCTTCC<br>R:GTGTTGGTGGCTTACTGGTTAG   | chr7:151,447,540-151,449,273 * <sup>3</sup> |

\* presents the numbered primers location for Figure S2C and Figure 5A.

### Gene Expression Primer Sequences

| Name   | Forward primers (5'to 3') | Reverse primers (5'to 3') |
|--------|---------------------------|---------------------------|
| Lsh    | GCAGATGAAATGGGTTTGGGA     | GGGTTCCATGATACAGCAGAG     |
| Gapdh  | CCAGTATGACTCCACTCACGG     | GAAGACACCAGTAGACTCCACG    |
| Tubb3  | TGGAGCGCATCAGCGTATACTACA  | TGCAGGCAGTCACAATTATCACAC  |
| Nlgn1  | ACCCCTTGCGAATCACTGT       | CTAGCGTATTTTGCAGGCTG      |
| Nrxn1  | CCAGTGACGATGAGGACATTG     | ATAGAGGAGGATGAGGATGCAC    |
| Shank2 | GAGCTAAACTCCATTCTGCAGC    | ACAGTGAAGGTGACCGTCGT      |
| Mib1   | GGTGACCTCAATGAAGAGCTG     | CCAGCACACTGTCCGTTTAC      |
| Slit2  | CCTGGAATTGCACGCTGT        | AATAGTGATATCCACGGGACCTT   |
| Grik2  | AGTTTTTGTGGCAGTGGGAG      | ACGCTGGCACTTCAGAGAC       |
| Negr1  | GGCATATCTCCCCATCAGC       | TCGTTTTCTGCACTGCATTC      |
| Rims1  | CAAGGCCTATTGGTGACATCC     | CCCACCTTATCATAACCACAGC    |
| Reln   | ACTGGAATTGAACCCCAACA      | GCTCACAGAAGGTGACAGCA      |
| Nrcam  | GAAAAGGAGGATGCTCATGC      | TTCACCCCTCTCCATAGTC       |

### Bisulfite Primer sequences

| Name | Sequence (5'to 3')                                                 | Chromosome position      |
|------|--------------------------------------------------------------------|--------------------------|
| Oct4 | F: ATGGGTTGAAATATTGGGTTTATTTA<br>R: CCACCCTCTAACCTTAACCTCTAAC      | ch17: 35642574-35642935  |
| (1)  | F: GGTTATAGTGGTTGTTTTGGTGGAGAG<br>R: CTACCTCTAATTCCATAACATATATAAAC | chr3:25646617-25647257   |
| (2)  | F: GATTTTTATTTGAAAAGGATTAAGTG<br>R: AAATAAACTTCTATTTTCAACAACC      | chr3:156566931-156567553 |
| (3)  | F: ATGTAAAGGAATATGGAATTGTTTTATG<br>R: CAACTCCCATCAATAAAAAACACAATC  | chr5:21834299-21834827   |
| (4)  | F: AAGATTTTGGAGTTAATAAGAGAAATTT<br>R: TATCTCACCAAATCCTCCCTAATAAAC  | chr7:151448409-151448949 |

|     |                                                                  |                          |
|-----|------------------------------------------------------------------|--------------------------|
| (5) | F: GTGATGTAGAAATTAATATTGTTTGTG<br>R: ATATCAAAAACAATAACTAAATAACC  | chr12:45558646-45559291  |
| (6) | F: GTTGGGAGTTTGTGTGTTGGAATTGGA<br>R: CTATAACAACAAACCACATCTACTAAC | chr12:45471607-45472267  |
| (7) | F: GTTGTGTTATAATATGTAAGTGGTG<br>R: CTTAAATACTCTCATCACAACCTCC     | chr3: 25704365-25704645  |
| (8) | F: ATGTAGATGTTATGTTGTTTTAAATT<br>R: AATCCTTTACATACACAACCCAAA     | chr3:156269810-156270349 |

**Primers sequences and chromosome locations of potential enhancers used for enhancer reporter assay**

| Name          | Sequence(5' to 3')                                                         | H3K4me1 peaks position       |
|---------------|----------------------------------------------------------------------------|------------------------------|
| <b>Mib1</b>   | F: GGAGGATCCGGAATGATGGCAACACTTATGC<br>R: CAGTCGACGAGCAGAAGAAAGGGCACTAAAC   | chr18:10,734,670-10,740,383  |
| <b>Negr1</b>  | F: CTTGGATCCCAAATGCCCAAATCTGTTCC<br>R: CTCGTCGACAAAAATGACCTCCCCTCACAG      | chr3:156,564,833-156,567,787 |
| <b>Nrxn1</b>  | F: CTTGGATCCGCCTGGTGAGTAGGTGTCTCTTC<br>R: GGTGTCGACCAGTATGCCCTTGTGATGCAG   | chr17:91,156,007-91,158,325  |
| <b>Nrcam</b>  | F: TTCGGATCCGGCAATTCTGTCTAGCATTG<br>R: CTCGTCGACCAACATGGCTGTTATGAAGAC      | chr12:45,471,230-45,476,393  |
| <b>Shank2</b> | F: CAAGGATCCATGTCACACACCACAGGCAAG<br>R: CAAGTCGACCATCTCTCCTAGTTCAGCAGAGC   | chr7:151,418,700-151,421,123 |
| <b>Nlgn1</b>  | F: CTTGGATCCCACTCCTCTGACCTGTCAAGTG<br>R: GACGTCGACCTAAGGAAATGGGGGTTGTG     | chr3:25,702,653-25,707,030   |
| <b>Grik2</b>  | F: TTCGGATCCACATGAAGCTGTGGAGCAAAAC<br>R: CTCGTCGACGTCTCAAACAACCTTTTCAGCTCC | chr10:49,436,251-49,437,731  |

**Primers sequences and chromosome locations of transcription factor binding motifs**

| Name         | Sequence(5' to 3')                                      | Chromosome position          |
|--------------|---------------------------------------------------------|------------------------------|
| <b>Negr1</b> | F: GGTCTATAGTGACCCAAATGCT<br>R: AGCTGTGTCCACAGAGTGATTTG | chr3:156,567,708-156,567,943 |
| <b>Rims1</b> | F: AGTGGGGTGGGGGGGTCTCC<br>R: TTCCTGGGGTCCAGGCTGCAG     | chr1:22,621,003-22,621,252   |
| <b>Nrxn1</b> | F: GTACCTTGATCAATCACCCCTC<br>R: GGGACAGTCGCTGATGATTA    | chr17:91,157,486-91,157,680  |
| <b>Nrcam</b> | F: GAGAAACCCTGTCTCGAAAAAC<br>R: GTAATCCAAAAACAATCAAGCC  | chr12:45,474,680-45,474,900  |

|                 |                                                           |                             |
|-----------------|-----------------------------------------------------------|-----------------------------|
| <b>Mib1</b>     | F: GGGACTTCAGGATAGAATTTTCC<br>R: GTAGACATCCACAACATGGTTGTT | chr18:10,736,394-10,736,572 |
| <b>Grik2</b>    | F: AGGCTCTGTTCCAAGACGAC<br>R: TGACACTAGATGGGAATGAAAGAC    | chr10:49,436,868-49,437,131 |
| <b>Nlgn1</b>    | F: GCTTTTTTTCTGCCTGTTGTG<br>R: GAGCCAGCTTCAGAATGTAGTG     | chr3:25,704,350-25,704,497  |
| <b>Slc25a21</b> | F: CACTGGTCCCAAGGAACAAC<br>R: CCTCTGCTGCCATGAAGAAA        | chr12:58,209,900-58,210,100 |
| <b>C2</b>       | F: CAGACTGCTTTAACCATCCGA<br>R: GTAATTTACCCCTCAGCCATG      | chr17:35,018,520-35,018,720 |
| <b>Sh3bp4</b>   | F: CTTACGTGGTATGCGCCCTA<br>R: GGAGGAACTGCTACGGGTTAG       | chr1:90986650-90986850      |
| <b>Pou2f2</b>   | F: TGAAGCTGCCTAGCCCTGAT<br>R: TTTTCTGGAGCTTTGGTCGAG       | chr7:25,916,400-25,916,600  |

Fig S1

**A**



**B**



Fig S2

**A**



**C**



**B**



Fig S3

# GO term analysis for KO-H3K4me1 marked genes





Fig S5



Fig S6



**B**



**C**

Table of teratoma sizes (Length x Width mm)

|     | 1   | 2    | 3     | 4   | 5   | 6    |
|-----|-----|------|-------|-----|-----|------|
| WT1 | 9x6 | 10x7 | 19x17 | 9x6 | 9x7 | 12x7 |
| WT2 | 7x6 | 8x5  | 11x10 | n/a | n/a | n/a  |
| WT3 | 5x5 | 4x4  | 1x1   | n/a | n/a | n/a  |
| KO1 | 8x5 | 8x7  | 10x8  | 2x2 | 5x4 | n/a  |
| KO2 | 9x7 | 12x7 | 19x6  | 9x7 | n/a | n/a  |
| KO3 | 7x7 | 11x8 | 4x4   | 2x2 | n/a | n/a  |

Fig S7



Fig S8

**A**



**B**



**C**



**D**



Fig S9



Fig S10
